# Supplementary material for: The global burden of maternal disorders attributable to iron deficiency related sub-disorders in 204 countries and territories: an analysis for the Global Burden of Disease study
Source: Front Public Health. 2024 Sep 5;12:1406549. doi: 10.3389/fpubh.2024.1406549 (PMC11413869; doi:10.3389/fpubh.2024.1406549)
Supplement: SUPPLEMENTARY TABLE S2 — The EAPC of the ASDR for maternal disorder associated with iron deficiency. [file Table_2.xlsx]

## Sheet: EAPC_Death
Characteristics	Ectopic pregnancy	Indirect maternal deaths	Late maternal deaths	Maternal abortion and miscarriage	Maternal deaths aggravated by HIV/AIDS	Maternal hemorrhage	Maternal hypertensive disorders	Maternal obstructed labor and uterine rupture	Maternal sepsis and other maternal infections	Other maternal disorders
Global	-1.2 (-1.36--1.03)	-1.12 (-1.37--0.86)	-0.56 (-0.68--0.43)	-5.43 (-5.64--5.22)	-0.25 (-1.19-0.7)	-4.15 (-4.33--3.98)	-2.8 (-2.91--2.69)	-0.76 (-1.34--0.17)	-4.4 (-4.75--4.05)	-0.92 (-1.18--0.66)
Low SDI	-1.53 (-1.68--1.38)	-0.43 (-0.62--0.23)	-1.03 (-1.25--0.81)	-5.12 (-5.45--4.78)	-2.48 (-3.29--1.67)	-3.66 (-3.87--3.46)	-2.23 (-2.42--2.04)	-0.77 (-1.23--0.3)	-3.9 (-4.42--3.38)	-0.93 (-1.14--0.73)
Low-middle SDI	-2.18 (-2.41--1.95)	-2.23 (-2.64--1.83)	-2.22 (-2.29--2.15)	-8.94 (-9.29--8.59)	0.97 (-0.07-2.03)	-5.37 (-5.59--5.15)	-4.36 (-4.52--4.2)	-1.53 (-2.37--0.67)	-7.77 (-8.18--7.36)	-1.64 (-2.02--1.25)
Middle SDI	-3.42 (-3.83--3.01)	-2.34 (-2.53--2.16)	-1.05 (-1.25--0.84)	-9.79 (-10.05--9.52)	4.52 (1.83-7.28)	-6.21 (-6.47--5.96)	-5.03 (-5.23--4.82)	-2.36 (-2.58--2.14)	-8.64 (-9.07--8.2)	-2.98 (-3.36--2.59)
High-middle SDI	-5.46 (-5.74--5.18)	-3.9 (-4.2--3.59)	-1.95 (-2.31--1.6)	-9.21 (-9.57--8.84)	-0.87 (-2.88-1.17)	-7.39 (-7.69--7.1)	-6.22 (-6.43--6)	-4.29 (-4.67--3.91)	-8.93 (-9.31--8.54)	-3.85 (-4.09--3.61)
High SDI	-3.16 (-3.33--2.98)	3.68 (3.13-4.24)	3.35 (2.7-4)	-5.97 (-6.43--5.5)	4.9 (4.41-5.4)	-4.41 (-4.58--4.25)	-2.34 (-2.56--2.12)	-1.39 (-1.56--1.22)	-4.76 (-5.67--3.84)	0.61 (0.3-0.93)
East Asia	-7.58 (-8.1--7.04)	-6.69 (-7.49--5.89)	-7.74 (-8.17--7.31)	-11.59 (-11.86--11.31)	-2.37 (-3.71--1)	-12.64 (-13.31--11.97)	-9.98 (-10.55--9.39)	-6.13 (-6.88--5.37)	-12.3 (-12.73--11.88)	-6.67 (-7.08--6.25)
Southeast Asia	-3.52 (-3.79--3.25)	-1.52 (-1.63--1.41)	-3.6 (-3.72--3.47)	-10.13 (-10.34--9.93)	0.93 (-1.44-3.36)	-6.13 (-6.39--5.87)	-4.09 (-4.36--3.83)	-2.13 (-2.68--1.58)	-7.85 (-8.25--7.45)	-2.87 (-3.23--2.49)
Central Asia	-2.92 (-3.06--2.78)	1.52 (0.85-2.19)	-2.04 (-2.35--1.73)	-9.63 (-10.05--9.22)	4.24 (3.83-4.64)	-5.17 (-5.38--4.95)	-3.05 (-3.38--2.72)	-1.99 (-2.6--1.38)	-4.67 (-5.12--4.23)	-1.92 (-2.24--1.61)
South Asia	-3.43 (-3.72--3.15)	-3.23 (-3.7--2.75)	-3.48 (-3.62--3.34)	-10.41 (-11.04--9.76)	1.59 (-1.72-5)	-5.93 (-6.22--5.65)	-4.72 (-4.86--4.58)	-3.85 (-5--2.69)	-8.88 (-9.52--8.24)	-2.63 (-3.15--2.12)
Australasia	-4.17 (-4.95--3.37)	0.56 (-0.31-1.43)	-2.5 (-3.26--1.74)	-6.25 (-7.11--5.39)	4.15 (3.43-4.87)	-4.04 (-4.95--3.12)	-3.37 (-4.14--2.59)	-1.44 (-2.34--0.53)	-5.18 (-6.01--4.33)	-1.54 (-2.16--0.91)
Oceania	-0.78 (-1.07--0.49)	0.33 (0.01-0.66)	-1.1 (-1.25--0.94)	-4.94 (-5.14--4.74)	15.42 (11.17-19.83)	-2.31 (-2.48--2.14)	-0.6 (-0.95--0.25)	-0.17 (-0.48-0.14)	-2.34 (-2.77--1.91)	-0.58 (-0.86--0.29)
Central Europe	-8.29 (-8.84--7.74)	0.2 (-1.26-1.68)	-4.12 (-4.6--3.63)	-12.35 (-12.95--11.75)	2.5 (1.85-3.15)	-7.05 (-7.41--6.7)	-4.89 (-5.25--4.52)	-1.54 (-1.93--1.16)	-11.6 (-12.2--10.99)	-2.63 (-3.17--2.09)
Eastern Europe	-9.81 (-10.3--9.33)	-4.35 (-4.63--4.07)	-4.68 (-5.02--4.34)	-8.83 (-9.11--8.55)	9.65 (9.26-10.05)	-6.25 (-6.51--5.99)	-6.33 (-6.57--6.08)	-4.73 (-5.35--4.1)	-7.36 (-7.84--6.88)	-2.68 (-3.01--2.36)
Western Europe	-5.64 (-5.94--5.35)	-2.51 (-2.86--2.16)	-3.82 (-4.16--3.48)	-7.81 (-8.19--7.42)	0.3 (-0.15-0.76)	-4 (-4.28--3.72)	-4.36 (-4.62--4.1)	-3.48 (-3.81--3.15)	-7.83 (-8.67--6.98)	-1.06 (-1.33--0.79)
High-income Asia Pacific	-6.22 (-6.45--5.98)	-3.46 (-3.72--3.19)	-3.2 (-3.69--2.7)	-10.16 (-10.83--9.49)	2.99 (2.7-3.29)	-6.91 (-7.1--6.73)	-8.2 (-8.66--7.72)	-5.97 (-6.27--5.67)	-13.18 (-14.85--11.47)	-2.23 (-2.43--2.03)
High-income North America	-2.22 (-2.53--1.9)	8.43 (7.37-9.51)	4.35 (3.57-5.14)	-1.96 (-2.3--1.61)	5.92 (5.34-6.51)	-0.35 (-0.83-0.14)	1.38 (0.79-1.97)	4.52 (3.51-5.54)	0.66 (0.15-1.17)	3.48 (2.9-4.07)
Southern Latin America	-0.4 (-0.8-0)	2.72 (2.08-3.37)	0.75 (0.43-1.06)	-4.72 (-4.91--4.53)	2.91 (2.05-3.78)	-3.72 (-3.95--3.5)	-3.29 (-3.47--3.1)	7.2 (5.65-8.78)	-4.53 (-5.02--4.05)	3.18 (2.13-4.24)
Andean Latin America	0.98 (0.01-1.96)	3.38 (2.81-3.95)	-4.23 (-4.63--3.84)	-10.08 (-10.63--9.52)	-0.09 (-0.51-0.32)	-6.82 (-7.09--6.56)	-5.7 (-5.96--5.44)	10.56 (8.79-12.37)	-8.67 (-9.15--8.18)	2.7 (1.45-3.97)
Central Latin America	-3.2 (-3.53--2.88)	1.3 (0.93-1.68)	-1.29 (-2.07--0.51)	-7.83 (-8.27--7.39)	2.53 (2.01-3.06)	-5.1 (-5.39--4.81)	-4.01 (-4.28--3.74)	-1.51 (-1.75--1.28)	-6.8 (-7.27--6.32)	-3.64 (-3.94--3.35)
Tropical Latin America	-3.3 (-4.08--2.51)	-0.04 (-0.22-0.14)	-1.46 (-2.45--0.45)	-6.23 (-6.69--5.77)	2.46 (2.13-2.78)	-4.89 (-5.31--4.46)	-3.91 (-4.32--3.5)	-2.99 (-3.34--2.63)	-4.48 (-5.01--3.94)	-3.02 (-3.5--2.53)
Caribbean	6.01 (5.07-6.97)	2.41 (2.04-2.78)	1.29 (1.07-1.5)	-3.45 (-3.68--3.22)	-0.97 (-1.35--0.59)	1.13 (0.74-1.52)	1.52 (1.19-1.86)	8.19 (6.74-9.67)	0.73 (0.38-1.07)	7.18 (6.13-8.24)
North Africa and Middle East	-3.57 (-3.64--3.51)	-1.22 (-1.26--1.17)	-2.69 (-2.78--2.61)	-7.41 (-7.56--7.26)	1.17 (0.04-2.31)	-4.89 (-5.04--4.75)	-4.52 (-4.64--4.41)	-0.86 (-0.97--0.76)	-6.26 (-6.53--5.99)	-2.52 (-2.66--2.39)
Central Sub-Saharan Africa	-0.75 (-1.06--0.44)	1.03 (0.65-1.4)	-0.31 (-0.77-0.15)	-4.44 (-4.82--4.05)	-2.07 (-3.04--1.1)	-2.51 (-2.83--2.19)	-1.98 (-2.27--1.68)	0.75 (0.19-1.31)	-0.05 (-1.12-1.04)	0.49 (0.1-0.88)
Eastern Sub-Saharan Africa	-2.25 (-2.32--2.18)	-0.87 (-1.22--0.52)	-2.03 (-2.15--1.91)	-6.85 (-7.19--6.5)	-3.85 (-4.64--3.06)	-3.59 (-3.7--3.48)	-2.3 (-2.47--2.13)	0.33 (-0.14-0.8)	-5.14 (-5.58--4.7)	-1.93 (-2.01--1.85)
Southern Sub-Saharan Africa	-2.19 (-3.36--1.01)	1.9 (0.18-3.64)	-0.92 (-2.07-0.23)	-2.77 (-4.2--1.32)	2.82 (0.8-4.89)	-2.43 (-3.66--1.19)	-1.4 (-2.71--0.06)	-0.42 (-1.64-0.81)	-0.79 (-2.15-0.6)	-0.84 (-2.05-0.38)
Western Sub-Saharan Africa	-1.11 (-1.44--0.78)	1.24 (1.02-1.47)	-0.01 (-0.37-0.35)	-2.83 (-3.26--2.41)	1.05 (-0.22-2.34)	-2.02 (-2.31--1.74)	-1.36 (-1.64--1.09)	0.05 (-0.13-0.23)	-3.51 (-3.89--3.12)	-0.68 (-0.92--0.44)
