# Supplementary material for: The global burden of maternal disorders attributable to iron deficiency related sub-disorders in 204 countries and territories: an analysis for the Global Burden of Disease study
Source: Front Public Health. 2024 Sep 5;12:1406549. doi: 10.3389/fpubh.2024.1406549 (PMC11413869; doi:10.3389/fpubh.2024.1406549)
Supplement: SUPPLEMENTARY TABLE S5 — The EAPC of the DALY burden of maternal disorders caused by iron deficiency across 204 countries. [file Table_5.xlsx]

## Sheet: EAPC_DALYs
Characteristics	Ectopic pregnancy	Indirect maternal deaths	Late maternal deaths	Maternal abortion and miscarriage	Maternal deaths aggravated by HIV/AIDS	Maternal hemorrhage	Maternal hypertensive disorders	Maternal obstructed labor and uterine rupture	Maternal sepsis and other maternal infections	Other maternal disorders
Estonia	-9.5 (-10.87--8.11)	-10.38 (-12.52--8.18)	-6.69 (-8.88--4.45)	-9.79 (-10.89--8.67)	17.97 (13.89-22.2)	-3.8 (-4.2--3.39)	-3.3 (-4.07--2.52)	-1.04 (-1.38--0.69)	-1.51 (-1.85--1.17)	-7 (-8.64--5.32)
Bulgaria	-8.9 (-10.15--7.64)	-2.6 (-3.25--1.95)	-4.02 (-4.75--3.28)	-10.53 (-11.54--9.51)	0.92 (-0.21-2.08)	-2.85 (-3.14--2.57)	-2.07 (-2.43--1.71)	0.67 (0.32-1.02)	-4.7 (-5.11--4.28)	-0.43 (-1.26-0.41)
Maldives	-8.89 (-9.3--8.47)	-7.42 (-7.72--7.13)	-6.45 (-6.91--5.99)	-16.1 (-16.61--15.59)	-6.76 (-6.99--6.53)	-12.76 (-13.1--12.42)	-11.37 (-11.94--10.8)	-2.1 (-2.57--1.63)	-11.59 (-12.28--10.9)	-8.89 (-9.3--8.47)
Russian Federation	-8.75 (-9.15--8.33)	-4.94 (-5.24--4.64)	-5.04 (-5.31--4.76)	-6.93 (-7.17--6.68)	10.35 (9.88-10.82)	-3.08 (-3.22--2.94)	-3.04 (-3.28--2.79)	-2.25 (-2.44--2.05)	-2.98 (-3.18--2.77)	-2.08 (-2.39--1.76)
Qatar	-8.72 (-9.13--8.31)	-8.78 (-9.38--8.18)	-4.57 (-5.22--3.92)	-11.5 (-11.86--11.13)	-10.93 (-11.62--10.22)	-8.27 (-8.72--7.81)	-8.92 (-9.55--8.29)	-6.92 (-7.42--6.43)	-9.57 (-9.88--9.26)	-8.91 (-9.34--8.48)
Turkey	-8.69 (-9.59--7.79)	-3.37 (-4.28--2.45)	-6.58 (-7.59--5.56)	-14.27 (-15.4--13.13)	1.55 (0.67-2.44)	-9.08 (-9.73--8.42)	-8.48 (-9.09--7.87)	-6.67 (-7.46--5.86)	-10.87 (-11.7--10.04)	-5.75 (-6.49--5.01)
Democratic People's Republic of Korea	-8.2 (-8.48--7.92)	-7.31 (-7.8--6.81)	-6.96 (-7.07--6.85)	-8.92 (-9.68--8.15)	2.23 (0.53-3.95)	-7.55 (-7.67--7.44)	-7.33 (-7.49--7.17)	-5.02 (-5.31--4.73)	-1.76 (-2.77--0.74)	-6.01 (-6.13--5.88)
Bosnia and Herzegovina	-7.9 (-8.95--6.84)	-5.05 (-5.6--4.49)	-8.28 (-9.26--7.29)	-15.67 (-17.54--13.77)	-10.03 (-11.42--8.62)	-4.88 (-5.86--3.89)	-5.84 (-6.71--4.96)	-1.43 (-1.93--0.93)	-8.9 (-10.48--7.28)	-2.66 (-3.28--2.03)
Jordan	-7.83 (-8.37--7.28)	-8.02 (-8.72--7.31)	-5.45 (-6.03--4.86)	-11 (-11.79--10.2)	-6.17 (-7.03--5.3)	-7.78 (-8.19--7.35)	-9.64 (-10.26--9.03)	-4.73 (-5.2--4.25)	-9.15 (-9.71--8.59)	-7.66 (-8.21--7.1)
Singapore	-7.6 (-8.61--6.57)	-5.98 (-7.19--4.76)	-3.34 (-4.62--2.05)	-9.39 (-10.02--8.75)	-0.62 (-2.63-1.43)	-5.23 (-5.87--4.59)	-3.1 (-3.47--2.73)	-2.09 (-2.5--1.68)	-5.67 (-6.27--5.06)	-4.87 (-6.01--3.71)
Cyprus	-7.58 (-9.88--5.22)	-9.99 (-11--8.96)	-6.98 (-8.01--5.95)	-6.06 (-6.61--5.52)	-1.23 (-2.64-0.19)	-6.91 (-7.11--6.71)	-7.78 (-8.16--7.39)	-5.24 (-5.61--4.88)	-6.01 (-6.24--5.79)	-8.68 (-9.38--7.98)
Hungary	-7.58 (-8.97--6.17)	7.16 (4.43-9.97)	1.66 (0.14-3.21)	-3.88 (-5.03--2.71)	-1.67 (-3.6-0.29)	-2.4 (-2.97--1.83)	-1.54 (-2.69--0.39)	-3.13 (-4.15--2.1)	-2.85 (-3.38--2.32)	-0.51 (-1.74-0.73)
Iran (Islamic Republic of)	-7.55 (-8.06--7.04)	-4.87 (-5.11--4.62)	-5.64 (-5.95--5.32)	-8.28 (-8.84--7.7)	6.6 (6.27-6.93)	-5.6 (-6.12--5.09)	-8.01 (-8.55--7.46)	-3.82 (-4.12--3.52)	-8.9 (-9.53--8.27)	-6.57 (-7--6.15)
Honduras	-7.53 (-7.86--7.2)	5.18 (3.32-7.07)	-4.28 (-4.58--3.99)	-12.94 (-13.51--12.36)	-1.64 (-2.11--1.16)	-4.87 (-5.38--4.35)	-4.84 (-5.33--4.35)	5.22 (4.15-6.3)	-10.26 (-10.64--9.88)	-4.91 (-5.15--4.66)
Oman	-7.46 (-8--6.9)	-5.68 (-6.37--4.98)	-5.85 (-6.37--5.33)	-14.85 (-15.16--14.54)	0.42 (-1.25-2.12)	-8.42 (-8.64--8.2)	-7.5 (-7.72--7.28)	-5.65 (-6.33--4.96)	-8.48 (-8.67--8.28)	-6.55 (-7.06--6.04)
Portugal	-7.39 (-8.37--6.39)	0.25 (-0.9-1.4)	-3.41 (-4.83--1.97)	-6.91 (-7.83--5.98)	3.61 (2.3-4.93)	-3.59 (-3.94--3.23)	-3.38 (-4.13--2.62)	-0.82 (-1--0.64)	-2.97 (-3.15--2.79)	-1.47 (-2.56--0.37)
Nepal	-7.14 (-7.69--6.59)	-1.95 (-2.54--1.36)	-4.57 (-4.79--4.36)	-14.52 (-14.94--14.09)	16.79 (11.04-22.83)	-5.87 (-6.11--5.62)	-5.92 (-6.21--5.64)	-4.52 (-4.98--4.06)	-11.16 (-11.41--10.92)	-4.93 (-5.14--4.73)
Dominica	7.05 (5.28-8.84)	3.14 (2.43-3.85)	0.61 (0.04-1.2)	-3.26 (-3.52--2.99)	0.67 (0.12-1.23)	-0.5 (-0.76--0.25)	-1.34 (-1.51--1.16)	3.14 (1.83-4.48)	-1.22 (-1.51--0.93)	5.28 (4.07-6.51)
United Arab Emirates	-7.03 (-7.67--6.39)	-5.33 (-6.03--4.63)	-5.5 (-6.32--4.68)	-8.45 (-9.12--7.78)	-1.38 (-2.27--0.48)	-6.75 (-7.19--6.3)	-5.97 (-6.49--5.44)	-5.16 (-5.7--4.62)	-7.46 (-8.13--6.78)	-5.43 (-6.01--4.83)
Syrian Arab Republic	-7.02 (-7.63--6.4)	-7.38 (-8.09--6.66)	-6.4 (-6.88--5.92)	-11.97 (-12.81--11.13)	-6.04 (-7.01--5.06)	-9.49 (-9.98--9)	-9.36 (-10.05--8.66)	-4.08 (-4.48--3.68)	-8.7 (-9.43--7.95)	-6.99 (-7.62--6.37)
China	-6.86 (-7.34--6.39)	-6.72 (-7.53--5.91)	-7.98 (-8.46--7.5)	-9.34 (-9.97--8.71)	-3.54 (-4.93--2.13)	-10.85 (-11.4--10.29)	-9 (-9.52--8.48)	-5.51 (-6.1--4.91)	-10.32 (-11.02--9.6)	-6.22 (-6.64--5.81)
Lebanon	-6.49 (-6.8--6.19)	-5.12 (-5.29--4.94)	-3.15 (-3.42--2.89)	-7.61 (-8.18--7.04)	-5.95 (-6.64--5.26)	-8.69 (-8.97--8.42)	-7.53 (-7.94--7.12)	-4.28 (-4.52--4.05)	-7.2 (-7.61--6.79)	-5.5 (-5.65--5.35)
Cuba	6.49 (4.98-8.02)	-1.48 (-1.88--1.07)	0.79 (0.46-1.13)	-5.25 (-5.63--4.86)	9.01 (8.14-9.88)	-0.4 (-0.68--0.12)	-2.48 (-2.73--2.23)	2.46 (1.6-3.34)	-3.64 (-4.04--3.23)	5.35 (4.09-6.62)
Tajikistan	-6.45 (-7.14--5.75)	-4.55 (-5.25--3.84)	-6.12 (-6.85--5.39)	-9.03 (-9.74--8.31)	-2.13 (-3.19--1.05)	-6.54 (-7.22--5.86)	-7.23 (-7.96--6.5)	-2.38 (-2.7--2.06)	-4.43 (-4.78--4.08)	-6.36 (-7.02--5.7)
Greenland	-6.36 (-7.52--5.2)	8.44 (7.7-9.19)	0.85 (0.27-1.43)	-3.85 (-4.02--3.69)	2.69 (2.22-3.17)	-1.52 (-1.64--1.4)	-2.66 (-3.09--2.22)	2.25 (1.82-2.68)	-2.09 (-2.29--1.9)	-1.03 (-1.53--0.53)
Chile	-6.14 (-6.66--5.61)	-2.15 (-2.72--1.58)	1.13 (-0.13-2.4)	-9.44 (-10.52--8.34)	2.36 (1.79-2.92)	-4.97 (-5.38--4.56)	-4.28 (-4.84--3.71)	-1.75 (-1.88--1.62)	-6.45 (-7.21--5.68)	-1.54 (-1.98--1.1)
Palestine	-6.01 (-6.39--5.62)	-6.48 (-7--5.95)	-3.69 (-4.15--3.23)	-4.71 (-5.38--4.02)	2.32 (0.66-4.01)	-6.01 (-6.44--5.57)	-3.92 (-4.58--3.24)	-4.25 (-4.74--3.75)	-7.37 (-7.8--6.93)	-5.4 (-5.89--4.91)
Guam	5.84 (5.44-6.24)	3.9 (3.2-4.61)	3.74 (3.41-4.08)	-1.41 (-1.96--0.85)	5.67 (5.1-6.24)	-0.32 (-0.74-0.09)	3.42 (3.09-3.76)	3.68 (3.45-3.91)	-0.85 (-1.02--0.69)	5.5 (5.11-5.89)
Czechia	-5.66 (-7.07--4.24)	-5.72 (-6.8--4.64)	-4.44 (-5.65--3.22)	-5.31 (-6.57--4.04)	2.71 (1.47-3.98)	-1.42 (-2.29--0.54)	-1.4 (-2.31--0.49)	0.19 (-0.36-0.75)	-1.75 (-2.62--0.87)	-2.65 (-3.92--1.37)
Croatia	-5.65 (-6.49--4.81)	0.91 (-1.42-3.29)	-2.49 (-3.74--1.22)	-7.29 (-8.19--6.38)	3.45 (1.97-4.94)	-2.74 (-3.01--2.47)	-4.04 (-4.68--3.4)	-2.36 (-2.73--1.99)	-2.13 (-2.34--1.93)	-2.03 (-3.06--0.98)
Republic of Korea	-5.65 (-6.2--5.1)	0.67 (-0.22-1.57)	-0.03 (-0.75-0.69)	-9.89 (-10.89--8.88)	2.31 (1.66-2.96)	-5.8 (-6.04--5.57)	-9.61 (-10.26--8.96)	-2.65 (-2.95--2.35)	-10.81 (-12.43--9.15)	0.28 (-0.63-1.19)
Japan	-5.49 (-5.76--5.22)	-5.25 (-5.57--4.92)	-4.87 (-5.62--4.1)	-7.77 (-8.6--6.94)	3.1 (2.63-3.57)	-2.81 (-3.1--2.52)	-3.25 (-3.71--2.79)	-1.86 (-2.11--1.61)	-2.2 (-2.4--1.99)	-3.21 (-3.65--2.76)
Jamaica	5.48 (3.16-7.85)	5.38 (3.54-7.25)	0.69 (-0.25-1.64)	-5.31 (-6.22--4.38)	3.74 (2.56-4.93)	-5.92 (-6.69--5.14)	-2.78 (-3.6--1.95)	2.11 (0.68-3.55)	-6.89 (-7.86--5.91)	8.45 (5.87-11.1)
Indonesia	-5.46 (-5.96--4.96)	-2.01 (-2.32--1.69)	-4.47 (-4.67--4.26)	-11.46 (-11.62--11.3)	7.7 (6.3-9.12)	-6.56 (-6.86--6.25)	-4.72 (-5.08--4.36)	-3.1 (-3.93--2.26)	-7.56 (-7.83--7.29)	-4.02 (-4.55--3.49)
North Macedonia	-5.37 (-5.78--4.95)	-3.05 (-3.29--2.81)	-3.56 (-3.97--3.16)	-6.48 (-6.98--5.98)	4.3 (3.81-4.79)	-2.94 (-3.2--2.68)	-4.54 (-4.89--4.2)	-1.14 (-1.4--0.87)	-5.52 (-5.94--5.09)	-4.16 (-4.57--3.74)
Puerto Rico	-5.36 (-6.3--4.4)	1.29 (-0.24-2.84)	-2.5 (-3.47--1.52)	-8.73 (-9.5--7.96)	-11.47 (-12.61--10.31)	-5.01 (-5.2--4.82)	-5.69 (-6.35--5.03)	-2.6 (-3.06--2.13)	-6.6 (-7.12--6.07)	-0.54 (-1.47-0.39)
Cabo Verde	-5.25 (-5.91--4.58)	-5.24 (-5.66--4.82)	-3.64 (-4.03--3.24)	-10.77 (-11.5--10.03)	-4.03 (-5.02--3.04)	-8.14 (-8.33--7.95)	-6.05 (-6.49--5.6)	-3.05 (-3.52--2.58)	-10.79 (-11.08--10.49)	-3.38 (-4.16--2.58)
Taiwan (Province of China)	-5.19 (-5.89--4.48)	-4.79 (-5.56--4.02)	-1.77 (-2.53--1.01)	-3.62 (-4.05--3.19)	3.54 (2.86-4.21)	-4.11 (-4.77--3.45)	-3.95 (-4.81--3.08)	-3.05 (-3.63--2.47)	-2.53 (-3.07--1.98)	-2.4 (-3.12--1.67)
Trinidad and Tobago	5.11 (3.82-6.42)	4.57 (3.6-5.55)	-1.66 (-2.27--1.04)	-9.22 (-10--8.44)	1.25 (0.28-2.22)	-1.62 (-2.03--1.21)	-4.93 (-5.69--4.17)	1.36 (0.55-2.17)	-6.26 (-6.91--5.6)	3.94 (2.74-5.16)
Venezuela (Bolivarian Republic of)	5.07 (4.31-5.85)	4.29 (3.71-4.87)	1.35 (0.26-2.46)	-4.18 (-5.11--3.24)	9.16 (8.38-9.94)	-1.93 (-2.54--1.31)	-0.32 (-1.13-0.49)	6.51 (5.67-7.36)	-4.17 (-5.23--3.09)	5.89 (4.89-6.89)
Iraq	-5.06 (-5.61--4.51)	-5.09 (-5.52--4.65)	-3.79 (-4.12--3.46)	-8.78 (-9.16--8.4)	-1.75 (-2.74--0.75)	-7.13 (-7.66--6.59)	-6.51 (-7.07--5.96)	-1.43 (-1.8--1.05)	-4.86 (-5.35--4.37)	-5.92 (-6.45--5.38)
Algeria	-5.03 (-5.28--4.78)	-4.35 (-4.55--4.16)	-3.4 (-3.74--3.05)	-10.66 (-11.21--10.11)	3.02 (2.69-3.35)	-6.22 (-6.62--5.82)	-5.29 (-5.63--4.96)	-2.54 (-2.79--2.29)	-9.91 (-10.32--9.5)	-5.17 (-5.42--4.91)
Ecuador	4.98 (3.81-6.16)	6.9 (5.84-7.98)	0.75 (0.02-1.48)	-5.97 (-6.74--5.18)	7.2 (6.68-7.73)	-4.46 (-4.81--4.11)	-4.04 (-4.35--3.73)	4.23 (3.48-4.98)	-5.33 (-6.27--4.38)	5.25 (3.97-6.55)
Lithuania	-4.96 (-6.04--3.86)	-2.81 (-4.23--1.37)	-3.58 (-5.23--1.89)	-6.36 (-7.25--5.46)	-2.79 (-4.12--1.44)	-2.56 (-3.18--1.93)	-4.6 (-5.41--3.78)	-1.33 (-1.71--0.95)	-2.43 (-3.02--1.83)	-2.16 (-3.28--1.03)
Equatorial Guinea	-4.9 (-5.42--4.37)	0.57 (-0.48-1.63)	-3.23 (-3.56--2.9)	-14.35 (-14.85--13.85)	-0.62 (-1.98-0.76)	-7.73 (-8.21--7.25)	-5.85 (-6.42--5.28)	-2.83 (-3.08--2.57)	-14.21 (-14.91--13.51)	-3.54 (-4.1--2.99)
Sao Tome and Principe	-4.88 (-5.75--4.01)	-3.16 (-4--2.31)	-3.49 (-4.26--2.71)	-8.92 (-9.96--7.88)	-0.8 (-1.83-0.25)	-6.85 (-7.52--6.19)	-5.87 (-6.68--5.05)	-3.66 (-4.28--3.04)	-7.45 (-8.52--6.37)	-4.38 (-5.11--3.64)
Slovenia	-4.85 (-6.27--3.41)	-1.25 (-3.29-0.83)	2.71 (0.63-4.84)	-2.63 (-3.46--1.79)	7.09 (4.94-9.29)	-1.69 (-1.93--1.44)	-0.87 (-1.6--0.14)	1.04 (0.34-1.74)	-1.31 (-1.6--1.01)	1.8 (0.23-3.39)
Libya	-4.82 (-5.4--4.24)	-3.51 (-4.04--2.99)	-3.31 (-3.94--2.67)	-7.72 (-8.27--7.17)	0.12 (-0.23-0.48)	-6.02 (-6.37--5.68)	-6.03 (-6.42--5.63)	-3.13 (-3.45--2.8)	-6.24 (-6.89--5.57)	-3.69 (-4.12--3.24)
Guatemala	-4.81 (-5.81--3.79)	-2.05 (-2.95--1.14)	-4.97 (-6.08--3.85)	-10.77 (-11.69--9.84)	-0.41 (-1.93-1.14)	-6.88 (-7.81--5.93)	-6.5 (-7.42--5.57)	0.61 (-0.05-1.26)	-9.05 (-9.93--8.16)	-4.42 (-5.5--3.32)
Bhutan	-4.76 (-5.03--4.49)	-3.48 (-3.63--3.33)	-2.86 (-2.96--2.77)	-14.01 (-14.28--13.73)	-0.74 (-1--0.49)	-7.85 (-8.09--7.62)	-7.84 (-8.07--7.6)	-7.19 (-7.49--6.9)	-9.78 (-10.11--9.44)	-4.05 (-4.33--3.76)
Austria	-4.74 (-5.55--3.93)	-0.95 (-2.41-0.54)	-2.8 (-4.08--1.51)	-3.84 (-4.33--3.36)	3.83 (2.61-5.07)	-2.4 (-2.71--2.1)	-2.26 (-2.73--1.79)	-5.43 (-6.08--4.77)	-0.75 (-0.86--0.63)	-0.53 (-1.45-0.4)
Costa Rica	-4.74 (-5.55--3.92)	5.35 (3.32-7.41)	-1.8 (-2.45--1.15)	-7.65 (-8.5--6.79)	3.39 (2.47-4.33)	-4.11 (-4.55--3.66)	-5.56 (-6.23--4.88)	-1.8 (-2.2--1.39)	-6.25 (-7.26--5.23)	2.71 (1.42-4.01)
Haiti	4.7 (3.67-5.73)	6.72 (5.9-7.54)	-0.19 (-0.53-0.16)	-5.22 (-5.51--4.92)	-3.26 (-3.68--2.84)	-0.2 (-0.69-0.29)	0.95 (0.41-1.5)	3.69 (3.22-4.15)	-1.1 (-1.45--0.74)	5.68 (4.61-6.77)
Rwanda	-4.61 (-5.14--4.08)	0.17 (-0.15-0.5)	-3.12 (-3.65--2.59)	-11.24 (-12.2--10.27)	-4.94 (-6.67--3.19)	-6.33 (-6.81--5.85)	-6.05 (-6.65--5.44)	-3.17 (-3.39--2.95)	-7.93 (-8.94--6.91)	-4.08 (-4.58--3.58)
Eswatini	-4.6 (-5.4--3.79)	-0.74 (-1.6-0.12)	-2.08 (-2.77--1.37)	-5.81 (-7.13--4.46)	3.61 (0.25-7.08)	-3.94 (-4.68--3.19)	-2.48 (-3.51--1.43)	-1.79 (-2.01--1.57)	-3.58 (-4.78--2.36)	-1.54 (-2.41--0.66)
Kuwait	-4.58 (-5.78--3.37)	-6.43 (-7.98--4.86)	-3.23 (-4.85--1.58)	-6.11 (-7.06--5.16)	-3.08 (-4.85--1.27)	-5.59 (-6.4--4.78)	-4.91 (-5.84--3.97)	-3.58 (-4.56--2.59)	-4.63 (-5.56--3.7)	-2.99 (-4.63--1.33)
Tunisia	-4.55 (-4.71--4.38)	-2.53 (-2.89--2.17)	-3.14 (-3.31--2.97)	-11.47 (-12.06--10.87)	5.7 (5.23-6.18)	-7.4 (-7.57--7.23)	-5.66 (-5.81--5.51)	-1.57 (-1.94--1.19)	-7.6 (-8.11--7.08)	-3.55 (-3.69--3.4)
United Kingdom	-4.54 (-4.85--4.24)	-1.35 (-1.99--0.7)	-10.06 (-11.38--8.72)	-3.35 (-3.54--3.16)	6.01 (4.24-7.8)	-1.07 (-1.29--0.85)	-1.54 (-1.81--1.27)	-0.2 (-0.37--0.03)	-1.03 (-1.29--0.77)	-0.93 (-1.34--0.52)
Belize	4.39 (3.15-5.66)	2.94 (2.47-3.41)	2.2 (1.73-2.68)	-3.46 (-3.66--3.27)	6.56 (5.59-7.53)	-1.49 (-1.73--1.25)	-0.76 (-1.12--0.41)	4.12 (2.68-5.58)	-1.48 (-1.72--1.23)	5.3 (4.13-6.48)
Comoros	-4.37 (-4.95--3.78)	-2.15 (-2.69--1.61)	-3.64 (-4.18--3.1)	-10.98 (-11.69--10.27)	10.77 (9.64-11.9)	-6.19 (-6.71--5.67)	-4.82 (-5.45--4.19)	-3.22 (-3.5--2.94)	-5.05 (-5.64--4.45)	-3.32 (-3.8--2.84)
Viet Nam	-4.37 (-4.74--4.01)	-0.68 (-1.14--0.22)	-3.14 (-3.72--2.57)	-12.16 (-12.91--11.4)	1.25 (0.74-1.76)	-5.97 (-6.57--5.37)	-4.55 (-4.96--4.15)	-1.68 (-1.91--1.46)	-7.42 (-7.94--6.9)	-3.83 (-4.23--3.42)
Morocco	-4.35 (-4.74--3.96)	-1.25 (-1.76--0.74)	-4.34 (-5.48--3.18)	-12.79 (-13.1--12.49)	-7.35 (-7.8--6.91)	-6.74 (-7.09--6.4)	-6.76 (-7.17--6.36)	-0.63 (-1.19--0.06)	-10.17 (-10.41--9.93)	-4.35 (-4.74--3.95)
Malaysia	-4.32 (-4.78--3.86)	-3.33 (-3.68--2.97)	-3.03 (-3.45--2.61)	-8.5 (-9.16--7.84)	1.55 (0.57-2.53)	-6.98 (-7.47--6.49)	-4.35 (-4.8--3.89)	-3.64 (-3.91--3.37)	-8.33 (-8.85--7.8)	-4.91 (-5.28--4.53)
Tuvalu	-4.31 (-4.43--4.18)	-2.09 (-2.43--1.74)	-3.78 (-3.87--3.69)	-8.93 (-9.14--8.71)	2.71 (2.1-3.33)	-6.27 (-6.46--6.09)	-3.77 (-3.94--3.6)	-1.74 (-2.08--1.4)	-6.88 (-7.08--6.68)	-3.09 (-3.27--2.91)
Lao People's Democratic Republic	-4.3 (-4.71--3.9)	-4.59 (-4.92--4.25)	-4.81 (-4.97--4.64)	-12.36 (-13.14--11.57)	13.36 (8.56-18.37)	-7.55 (-7.87--7.24)	-5.49 (-5.69--5.3)	-3.33 (-3.5--3.15)	-10.78 (-11.42--10.14)	-4.57 (-4.88--4.26)
Samoa	-4.24 (-4.71--3.77)	-2.37 (-3.07--1.66)	-4.1 (-4.6--3.6)	-8.03 (-8.49--7.57)	-2.91 (-3.79--2.03)	-5.51 (-5.81--5.2)	-3.84 (-4.27--3.41)	-2.55 (-3.1--2)	-6.82 (-7.35--6.28)	-3.15 (-3.63--2.66)
South Africa	-4.22 (-5.79--2.63)	1.97 (-0.17-4.16)	-1.59 (-2.95--0.2)	-5.91 (-7.81--3.98)	4.72 (1.17-8.39)	-3.94 (-5.36--2.49)	-3.03 (-4.55--1.48)	-2.08 (-2.81--1.35)	-5.08 (-7.06--3.06)	-2.19 (-3.7--0.66)
Barbados	4.22 (3.19-5.27)	0.65 (0.17-1.13)	1.22 (0.78-1.67)	-4.16 (-4.66--3.65)	4.98 (4.08-5.9)	-2.31 (-2.52--2.1)	-2.18 (-2.5--1.85)	3.96 (2.96-4.98)	-2.79 (-3.45--2.13)	3.98 (3.08-4.89)
Antigua and Barbuda	4.16 (3.29-5.04)	0.76 (0.35-1.17)	0.84 (0.48-1.2)	-4.74 (-5.25--4.22)	-1.6 (-2.04--1.17)	-2.49 (-2.59--2.38)	-2.46 (-2.75--2.17)	2.39 (1.46-3.32)	-2.94 (-3.6--2.27)	4.01 (3.39-4.63)
Australia	-4.09 (-4.88--3.3)	-5.05 (-6.05--4.03)	-2.8 (-3.63--1.97)	-1.96 (-2.3--1.62)	2.05 (1.26-2.85)	-0.89 (-1.13--0.65)	-2.36 (-2.73--1.98)	-0.14 (-0.29-0.01)	0.1 (-0.23-0.44)	-0.32 (-0.92-0.28)
India	-4.09 (-4.44--3.73)	-3.17 (-3.65--2.69)	-4.1 (-4.42--3.79)	-10.47 (-11.27--9.67)	0.69 (-2.78-4.28)	-6.35 (-6.69--6)	-6.59 (-6.88--6.29)	-3.93 (-4.51--3.35)	-9.27 (-9.99--8.55)	-2.83 (-3.39--2.27)
Uruguay	-4.08 (-4.68--3.48)	6.94 (5.9-7.98)	-1.26 (-1.91--0.61)	-5.79 (-6.43--5.15)	4.14 (3.28-5.01)	-2.36 (-2.67--2.05)	-4.18 (-4.85--3.5)	-1.06 (-1.19--0.93)	-2.81 (-3.28--2.33)	0.85 (0.36-1.35)
Mexico	-4.03 (-4.46--3.61)	2.91 (2.14-3.69)	-1.26 (-2.12--0.41)	-4.43 (-4.7--4.15)	0.51 (0.15-0.88)	-4.95 (-5.09--4.81)	-3.76 (-3.94--3.57)	-3.36 (-3.61--3.11)	-3.99 (-4.39--3.59)	-4.7 (-5.1--4.29)
Netherlands	-4.02 (-4.44--3.61)	-7.26 (-8.91--5.57)	-4.08 (-5.16--2.98)	-2.89 (-3.13--2.65)	-1.07 (-2.17-0.05)	-2.62 (-2.92--2.32)	-4.64 (-5.4--3.88)	-0.35 (-0.45--0.25)	-0.85 (-1.01--0.69)	-2.38 (-2.94--1.81)
Bahrain	-4.01 (-4.61--3.4)	-6.42 (-7.48--5.35)	-1.37 (-2.06--0.68)	-7.95 (-8.67--7.23)	-2.25 (-3.32--1.17)	-4.55 (-4.97--4.12)	-6.33 (-6.89--5.77)	-2.49 (-2.93--2.05)	-5.29 (-5.91--4.66)	-3.8 (-4.46--3.13)
Azerbaijan	-3.92 (-4.31--3.53)	-0.75 (-1.42--0.08)	-3.23 (-3.8--2.64)	-10.21 (-10.75--9.66)	2.24 (1.5-3)	-4.83 (-5.25--4.41)	-4.89 (-5.34--4.44)	-1.46 (-1.79--1.11)	-6.56 (-6.94--6.17)	-3.6 (-4.05--3.15)
Egypt	-3.92 (-4.1--3.74)	-0.01 (-0.42-0.39)	-3.65 (-3.89--3.42)	-13.2 (-13.89--12.5)	-2.34 (-3.32--1.34)	-7.33 (-7.49--7.16)	-5.85 (-6.05--5.65)	1.72 (1.36-2.07)	-10.41 (-10.85--9.96)	-3.39 (-3.61--3.18)
Italy	-3.9 (-4.28--3.53)	-6.15 (-6.75--5.54)	1.44 (-2.03-5.03)	-2.7 (-2.96--2.43)	-2 (-2.54--1.45)	-2.04 (-2.31--1.77)	-1.93 (-2.25--1.61)	1.11 (0.64-1.58)	-1.11 (-1.29--0.93)	0.22 (-0.44-0.88)
Norway	-3.88 (-4.74--3.02)	-5.15 (-7.33--2.92)	-5.02 (-6.92--3.08)	-3.18 (-3.66--2.69)	2.25 (-0.15-4.72)	-2.97 (-3.24--2.71)	-3.88 (-4.66--3.08)	-1.85 (-2.06--1.62)	-2.21 (-2.39--2.03)	-1.92 (-3.35--0.46)
Mongolia	-3.88 (-4.36--3.4)	11.53 (10.19-12.89)	-4.56 (-5.16--3.94)	-12.84 (-13.74--11.94)	6.4 (2.53-10.41)	-9.38 (-10.07--8.68)	-2.42 (-2.6--2.25)	0.76 (0.32-1.2)	-8.86 (-9.35--8.36)	1.44 (1.08-1.8)
Guyana	3.79 (2.54-5.04)	0.59 (0.16-1.03)	-0.15 (-0.59-0.28)	-5.39 (-5.7--5.07)	4.77 (3.25-6.3)	-3.18 (-3.53--2.83)	-2.58 (-2.93--2.23)	5.52 (3.94-7.12)	-4.03 (-4.38--3.68)	3.66 (2.55-4.78)
Germany	-3.75 (-4.13--3.37)	-4.19 (-4.71--3.67)	-2.58 (-3.04--2.12)	-4.82 (-5.54--4.11)	1.34 (0.48-2.2)	-1.94 (-2.3--1.59)	-2.01 (-2.43--1.6)	-0.17 (-0.3--0.04)	-2.49 (-3.24--1.73)	2.47 (2.08-2.86)
Niue	-3.73 (-3.93--3.53)	-2.53 (-2.79--2.27)	-1.41 (-1.6--1.21)	-5.58 (-5.8--5.36)	7.29 (6.72-7.87)	-4.84 (-5.08--4.61)	-2.65 (-2.87--2.42)	-2.44 (-2.64--2.24)	-4.96 (-5.23--4.68)	-2.62 (-2.82--2.42)
Malawi	-3.71 (-4.14--3.28)	-2.03 (-2.18--1.88)	-2.51 (-2.81--2.21)	-7.93 (-8.46--7.41)	-4.58 (-5.43--3.73)	-4.69 (-5--4.39)	-4.26 (-4.7--3.82)	0.4 (-0.27-1.07)	-4.26 (-4.78--3.74)	-3.08 (-3.5--2.66)
Zambia	-3.65 (-3.96--3.34)	-2.29 (-2.49--2.09)	-2.32 (-2.49--2.16)	-8.24 (-8.83--7.64)	-4.95 (-5.63--4.27)	-4.59 (-4.87--4.31)	-4.08 (-4.46--3.69)	-2.11 (-2.27--1.95)	-5.99 (-6.74--5.25)	-2.88 (-3.18--2.58)
Republic of Moldova	-3.62 (-4.1--3.14)	-5.36 (-6.29--4.42)	-3.51 (-4.47--2.54)	-11.37 (-12.39--10.33)	7.11 (6.13-8.09)	-4.66 (-5.28--4.03)	-4.45 (-5.16--3.74)	-3.6 (-3.94--3.26)	-6.11 (-6.76--5.46)	-1.17 (-1.78--0.55)
Micronesia (Federated States of)	-3.58 (-3.77--3.4)	-0.81 (-1.17--0.46)	-3.16 (-3.32--3)	-8.44 (-8.68--8.2)	6.01 (4.65-7.39)	-5.92 (-6.12--5.72)	-3.57 (-3.78--3.36)	-0.82 (-1.1--0.54)	-5.82 (-6--5.63)	-2.42 (-2.63--2.21)
Bermuda	-3.57 (-3.91--3.23)	-5.48 (-6.56--4.38)	0.75 (0.41-1.08)	-5.98 (-6.72--5.23)	-4.33 (-4.73--3.93)	-2.68 (-2.85--2.52)	-3.27 (-3.57--2.96)	-1.15 (-1.59--0.7)	-4.16 (-4.55--3.77)	-1.21 (-1.47--0.95)
Botswana	-3.56 (-4.28--2.84)	-0.84 (-1.56--0.12)	-1.8 (-2.41--1.18)	-7.55 (-8.31--6.8)	-3.24 (-4.55--1.92)	-4.66 (-5.19--4.13)	-3.11 (-3.76--2.46)	-0.68 (-0.94--0.42)	-6.9 (-7.74--6.05)	-2.57 (-3.3--1.83)
Georgia	3.5 (2.37-4.63)	10.86 (8.8-12.95)	4.56 (3.07-6.06)	2.79 (1.68-3.92)	25.02 (22.39-27.71)	1.01 (-0.08-2.11)	5.56 (3.98-7.16)	3.2 (2.38-4.03)	2.24 (1.15-3.33)	5.1 (3.57-6.66)
Gabon	-3.48 (-4.03--2.93)	-1.84 (-2.28--1.4)	-2.29 (-2.72--1.85)	-8.25 (-8.88--7.63)	-1.18 (-3.16-0.85)	-4.73 (-5.21--4.25)	-3.12 (-3.73--2.5)	-2.51 (-2.89--2.13)	-6.49 (-7.17--5.8)	-2.21 (-2.78--1.65)
Tokelau	-3.46 (-3.62--3.29)	-1.2 (-1.53--0.86)	-2.03 (-2.14--1.92)	-8.06 (-8.22--7.9)	3.83 (3.04-4.62)	-5.31 (-5.45--5.16)	-2.9 (-3.17--2.63)	-0.98 (-1.24--0.71)	-6.97 (-7.26--6.68)	-2.27 (-2.49--2.05)
Togo	-3.44 (-3.93--2.94)	-0.22 (-0.63-0.19)	-2.13 (-2.52--1.73)	-5.99 (-6.7--5.27)	-0.8 (-2.76-1.21)	-4.47 (-4.73--4.21)	-2.99 (-3.32--2.67)	-2 (-2.2--1.8)	-3.35 (-3.82--2.88)	-1.73 (-2.05--1.41)
Israel	-3.39 (-4.13--2.66)	0.97 (-0.05-2)	2.24 (0.98-3.52)	-5.24 (-5.89--4.59)	5.3 (4.3-6.3)	-3.21 (-3.73--2.69)	-2.15 (-2.78--1.51)	-0.52 (-0.68--0.37)	-3.48 (-4.29--2.67)	1 (0.04-1.96)
Ethiopia	-3.35 (-3.53--3.17)	-1.88 (-2.39--1.37)	-3.96 (-4.27--3.66)	-8.57 (-9.2--7.94)	-10.24 (-11.68--8.78)	-5.03 (-5.2--4.86)	-3.41 (-3.58--3.24)	-2.52 (-2.84--2.19)	-7.49 (-8.31--6.65)	-2.42 (-2.57--2.27)
Bangladesh	3.33 (2.31-4.36)	-4.83 (-5.51--4.15)	-4.53 (-5.06--3.99)	-13.36 (-13.98--12.73)	0	-4.98 (-5.34--4.62)	-9.16 (-9.58--8.73)	-9.07 (-9.52--8.61)	-10.19 (-11.31--9.06)	-1.4 (-1.72--1.08)
Cambodia	-3.31 (-3.75--2.88)	5.71 (5.08-6.34)	-5.58 (-6--5.16)	-13.25 (-13.91--12.59)	-2.1 (-6.53-2.54)	-4.56 (-5.09--4.02)	-4.12 (-4.59--3.64)	1.41 (0.76-2.06)	-10.14 (-11.14--9.12)	-0.87 (-1.7--0.03)
Nicaragua	-3.27 (-3.96--2.57)	-1.06 (-2.02--0.09)	-4.77 (-5.23--4.31)	-11.66 (-12.51--10.8)	6.53 (6.19-6.88)	-7.09 (-7.32--6.87)	-6.36 (-6.71--6)	1.3 (0.25-2.36)	-9.61 (-10.19--9.03)	-0.43 (-1.46-0.61)
Belarus	-3.27 (-3.73--2.82)	-1.67 (-2.2--1.14)	-0.08 (-0.73-0.57)	-6.92 (-7.63--6.21)	11.2 (10.34-12.06)	-2.8 (-3.09--2.51)	-2.61 (-2.97--2.26)	-0.69 (-1.07--0.32)	-1.61 (-2.01--1.21)	-0.27 (-0.74-0.19)
Serbia	-3.25 (-3.62--2.89)	6.49 (5.34-7.65)	-1.52 (-1.9--1.13)	-3.88 (-4.34--3.43)	1 (-0.19-2.21)	-4.56 (-4.98--4.13)	-5.52 (-5.86--5.18)	-3.46 (-3.73--3.19)	-4.68 (-5.02--4.33)	-2.68 (-2.99--2.36)
Colombia	-3.22 (-3.82--2.62)	-1.23 (-1.73--0.74)	0.53 (-0.87-1.95)	-6.89 (-7.53--6.26)	5.35 (4.12-6.59)	-5.4 (-5.8--5)	-5.03 (-5.55--4.51)	-2.36 (-2.79--1.93)	-4.96 (-5.43--4.5)	-2.84 (-3.32--2.37)
Brazil	-3.19 (-3.96--2.41)	-0.01 (-0.2-0.18)	-1.36 (-2.4--0.31)	-5.66 (-6.19--5.13)	2.17 (1.88-2.45)	-4.15 (-4.53--3.77)	-3.66 (-4.08--3.24)	-2.7 (-3.02--2.37)	-3.49 (-4.04--2.93)	-2.67 (-3.13--2.2)
Guinea-Bissau	-3.15 (-3.49--2.82)	-1.89 (-2.15--1.62)	-3.51 (-3.76--3.26)	-6.66 (-7.33--5.98)	3.05 (1.29-4.84)	-4.59 (-4.98--4.2)	-3.83 (-4.25--3.41)	-2.03 (-2.17--1.9)	-4.26 (-4.65--3.86)	-2.64 (-2.99--2.29)
Namibia	-3.13 (-3.55--2.71)	-0.63 (-1.13--0.13)	-1.44 (-1.73--1.15)	-8.7 (-9.43--7.97)	-1.19 (-2.57-0.2)	-5.27 (-5.69--4.86)	-3.9 (-4.4--3.41)	-2.27 (-2.43--2.11)	-6.42 (-7.07--5.77)	-2.22 (-2.65--1.79)
Kazakhstan	-3.11 (-3.81--2.41)	14.8 (12.54-17.11)	-3.71 (-4.12--3.3)	-10.73 (-11.68--9.77)	2.41 (1.73-3.1)	-5.17 (-5.72--4.62)	-5.24 (-5.71--4.77)	0.55 (-0.05-1.15)	0.26 (-0.08-0.6)	4.5 (3.9-5.11)
Finland	-3.09 (-3.56--2.62)	-8.27 (-9.4--7.12)	-4.35 (-5.63--3.05)	-5.32 (-5.95--4.69)	2.34 (0.95-3.74)	-3.77 (-4.03--3.52)	-2.87 (-3.24--2.5)	-1.17 (-1.47--0.87)	-3.4 (-4.17--2.62)	0.1 (-0.96-1.18)
Belgium	-3.07 (-3.65--2.48)	-5.33 (-6.23--4.42)	-2.74 (-3.68--1.79)	-5.38 (-6.19--4.56)	4.07 (2.57-5.59)	-1.54 (-1.79--1.3)	-1.25 (-1.59--0.92)	0.52 (0.14-0.9)	-2.87 (-3.75--1.98)	-0.14 (-0.91-0.64)
Sudan	-3.04 (-3.44--2.63)	-0.69 (-0.9--0.48)	-1.78 (-1.96--1.59)	-9.24 (-9.77--8.71)	1.67 (0.18-3.18)	-4.38 (-4.7--4.05)	-3.11 (-3.55--2.67)	-3.92 (-4.21--3.63)	-7.15 (-7.69--6.6)	-1.37 (-1.87--0.86)
Slovakia	-2.98 (-3.97--1.98)	-3.26 (-3.95--2.57)	-3.13 (-3.81--2.44)	-4.09 (-4.5--3.68)	3.28 (2.86-3.71)	-1.99 (-2.52--1.46)	-2.38 (-2.99--1.77)	-3.03 (-3.53--2.52)	-2.55 (-3.27--1.83)	-2.85 (-3.5--2.2)
Benin	-2.98 (-3.3--2.66)	0.69 (0.52-0.86)	-1.01 (-1.2--0.82)	-3.93 (-4.3--3.57)	3.39 (0.68-6.18)	-3.35 (-3.48--3.21)	-2.23 (-2.37--2.09)	-0.28 (-0.47--0.08)	-3.47 (-3.7--3.23)	-0.77 (-1--0.55)
Latvia	-2.93 (-3.8--2.06)	-6.45 (-8.32--4.54)	-1.31 (-3.24-0.67)	-4.46 (-5.4--3.51)	5.32 (3.33-7.35)	-3 (-3.9--2.09)	-4.26 (-5.21--3.29)	-0.06 (-0.9-0.78)	-2.26 (-2.84--1.68)	-1.18 (-2.7-0.36)
Burundi	-2.91 (-3.3--2.51)	0.91 (0.65-1.18)	-1.82 (-2.18--1.46)	-6.77 (-7.27--6.27)	-6.44 (-8.12--4.73)	-3.6 (-3.92--3.29)	-2.82 (-3.27--2.37)	-0.89 (-1.28--0.5)	-2.76 (-3.23--2.28)	-2.23 (-2.61--1.85)
Saudi Arabia	-2.86 (-3.29--2.42)	-3.44 (-3.72--3.17)	-1.75 (-2.11--1.4)	-11.28 (-11.59--10.97)	-5.23 (-5.82--4.64)	-7.85 (-8.18--7.52)	-5.67 (-5.91--5.43)	-3.1 (-3.32--2.88)	-6.61 (-6.81--6.4)	-3.6 (-3.94--3.26)
Fiji	-2.85 (-3.23--2.47)	-2.78 (-3.05--2.51)	-1.42 (-1.61--1.22)	-4.59 (-4.76--4.42)	5.17 (4.76-5.59)	-0.99 (-1.13--0.85)	-1.84 (-2.11--1.57)	-1.32 (-1.48--1.17)	-3.09 (-3.24--2.94)	-1.09 (-1.32--0.85)
Bahamas	2.84 (1.94-3.76)	0.23 (-0.31-0.77)	0.94 (0.51-1.38)	-5.03 (-5.75--4.31)	2.49 (1.93-3.05)	-2.92 (-3.15--2.69)	-2.34 (-2.86--1.82)	2.18 (1.27-3.11)	-3.24 (-3.96--2.52)	2.78 (2.11-3.45)
Seychelles	-2.78 (-3.19--2.38)	-1.53 (-1.84--1.22)	-1.72 (-2.14--1.29)	-7.18 (-7.89--6.45)	-1.52 (-2.05--0.98)	-3.63 (-4.05--3.21)	-3.53 (-4.02--3.04)	-1.52 (-1.67--1.37)	-4.25 (-4.88--3.62)	-2.2 (-2.51--1.89)
Bolivia (Plurinational State of)	2.78 (1.82-3.75)	5.38 (4.79-5.98)	-1.56 (-1.76--1.36)	-9.16 (-9.57--8.75)	-1.4 (-1.93--0.86)	-4.36 (-4.64--4.08)	-3.5 (-3.84--3.16)	3.2 (2.96-3.45)	-7.19 (-7.52--6.85)	4.28 (3.21-5.36)
Cook Islands	-2.75 (-3.02--2.48)	-2.26 (-2.5--2.01)	-1.73 (-2.09--1.38)	-3.82 (-4.17--3.47)	5.29 (4.96-5.62)	-2.4 (-2.5--2.31)	-1.31 (-1.36--1.26)	-1.61 (-1.73--1.49)	-1.9 (-2.01--1.79)	-1.35 (-1.59--1.11)
Luxembourg	-2.75 (-2.97--2.53)	-1.99 (-2.56--1.41)	-1.22 (-1.61--0.83)	-5.26 (-5.56--4.95)	2.45 (1.79-3.11)	-3.2 (-3.4--2.99)	-3.17 (-3.42--2.92)	-1.88 (-2.2--1.56)	-3.44 (-3.71--3.16)	-2.12 (-2.4--1.84)
Malta	-2.74 (-3.11--2.38)	0.16 (-0.22-0.55)	0.26 (-0.04-0.56)	-4.89 (-5.37--4.41)	7.65 (7.11-8.2)	-2.87 (-3.35--2.4)	-2.38 (-2.65--2.1)	-1.75 (-2.04--1.45)	-2.3 (-2.57--2.03)	-0.72 (-1.02--0.41)
Mali	-2.72 (-3--2.44)	1.89 (1.57-2.21)	-0.98 (-1.18--0.78)	-4.43 (-4.77--4.1)	0.74 (-0.73-2.23)	-3.07 (-3.23--2.9)	-3.48 (-3.68--3.29)	-2.29 (-2.89--1.7)	-5.33 (-5.65--5.02)	-3.44 (-3.68--3.19)
Sri Lanka	-2.72 (-2.89--2.56)	-3.23 (-3.45--3.02)	-2.13 (-2.66--1.59)	-8.28 (-8.68--7.88)	-2.42 (-3.11--1.73)	-6.15 (-6.4--5.9)	-5.77 (-6.05--5.5)	-2.2 (-2.32--2.07)	-6.05 (-6.26--5.84)	-3.09 (-3.27--2.91)
Palau	-2.64 (-2.85--2.44)	-2.21 (-2.39--2.03)	-1.63 (-1.79--1.47)	-4.34 (-4.63--4.05)	5.56 (5-6.12)	-3.59 (-3.83--3.35)	-2.21 (-2.39--2.03)	-2.12 (-2.31--1.94)	-2.64 (-2.83--2.45)	-2.4 (-2.6--2.19)
Armenia	-2.63 (-3.5--1.76)	-0.23 (-1.58-1.13)	-0.93 (-2.05-0.21)	-4.89 (-5.7--4.07)	21.37 (19.89-22.88)	-5.44 (-6.34--4.54)	-5.18 (-6.21--4.13)	-1.46 (-1.98--0.94)	-3.65 (-4.12--3.17)	-1.46 (-2.5--0.41)
Nauru	-2.63 (-3.08--2.19)	-1.18 (-1.65--0.7)	-1.58 (-1.85--1.3)	-4.98 (-5.83--4.13)	8.81 (7.69-9.94)	-4.4 (-4.78--4.01)	-1.69 (-2.43--0.94)	-1.19 (-1.51--0.87)	-2.61 (-4.14--1.05)	-1.51 (-2.05--0.97)
Argentina	2.6 (1.78-3.42)	4.16 (3.16-5.17)	0.68 (0.16-1.2)	-4.42 (-4.61--4.22)	2.21 (1.34-3.1)	-3.01 (-3.19--2.82)	-2.53 (-2.72--2.34)	-0.23 (-0.44--0.02)	-3.82 (-4.2--3.43)	4.61 (3.22-6.02)
Paraguay	2.56 (0.99-4.16)	2.44 (1.9-2.98)	-1.87 (-2.17--1.57)	-5.63 (-6.29--4.95)	5.87 (4.5-7.26)	-5.14 (-5.57--4.71)	-4.29 (-4.74--3.83)	-0.61 (-1.88-0.68)	-8.41 (-8.93--7.88)	3.73 (1.9-5.6)
Brunei Darussalam	-2.5 (-3--1.99)	-3.77 (-4.23--3.31)	-2.62 (-3.17--2.07)	-7.17 (-7.95--6.37)	3.27 (2.72-3.83)	-3.71 (-4.04--3.38)	-3.69 (-4.25--3.13)	-1.78 (-1.99--1.57)	-3.78 (-4.19--3.37)	-2.49 (-2.96--2.02)
Albania	-2.46 (-2.85--2.06)	-3.18 (-3.51--2.85)	-3.82 (-4.5--3.14)	-9.26 (-10.21--8.29)	-3.14 (-3.4--2.89)	-4 (-4.46--3.53)	-2.92 (-3.31--2.53)	-1.31 (-1.51--1.11)	-2.35 (-2.66--2.05)	-5.21 (-5.85--4.56)
Madagascar	-2.44 (-2.8--2.08)	-2.5 (-2.86--2.13)	-2.28 (-2.66--1.9)	-5.24 (-5.57--4.91)	10.61 (5.45-16.03)	-3.62 (-3.87--3.36)	-2.59 (-2.92--2.25)	-3.1 (-3.28--2.91)	-2.88 (-3.27--2.49)	-1.91 (-2.26--1.57)
Dominican Republic	2.39 (1.84-2.94)	1.59 (1.12-2.06)	1.14 (0.85-1.43)	-2.98 (-3.82--2.14)	3.91 (2.39-5.45)	-3.16 (-3.5--2.81)	-2.17 (-2.61--1.73)	3.31 (2.78-3.84)	-2.57 (-3.27--1.87)	3.58 (2.99-4.17)
Philippines	-2.37 (-2.48--2.25)	-1.1 (-1.17--1.02)	-1.93 (-2.02--1.84)	-5.57 (-5.78--5.36)	1.54 (1.34-1.73)	-3.57 (-3.66--3.48)	-2.89 (-2.99--2.79)	-1.4 (-1.57--1.24)	-4.89 (-5.04--4.74)	-1.95 (-2.08--1.83)
United States of America	-2.35 (-2.65--2.06)	8.11 (7.06-9.17)	4.25 (3.45-5.05)	-2.29 (-2.52--2.06)	5.42 (4.85-5.99)	-0.71 (-0.89--0.53)	0.47 (0.08-0.86)	-2.23 (-2.75--1.7)	-1.5 (-1.8--1.2)	3.06 (2.52-3.6)
United Republic of Tanzania	-2.32 (-2.7--1.94)	-0.79 (-1.37--0.22)	-1.11 (-1.54--0.68)	-5.97 (-6.41--5.53)	-2.63 (-2.97--2.29)	-2.81 (-3.17--2.45)	-1.19 (-1.5--0.87)	-2.06 (-2.59--1.53)	-4.24 (-4.54--3.93)	-2.06 (-2.46--1.66)
Tonga	-2.31 (-2.46--2.15)	-0.65 (-0.88--0.42)	-1.54 (-1.69--1.38)	-5.89 (-6.11--5.66)	1.43 (1.03-1.82)	-3.83 (-4.01--3.65)	-1.35 (-1.64--1.07)	0.23 (-0.01-0.47)	-4.05 (-4.19--3.92)	-1.24 (-1.41--1.08)
Ukraine	-2.3 (-2.96--1.63)	-2.64 (-3.42--1.85)	-4.86 (-5.4--4.3)	-2.88 (-3.44--2.31)	7.36 (6.27-8.46)	-3.91 (-4.56--3.26)	-2.97 (-3.67--2.27)	-1.4 (-1.92--0.87)	-1.97 (-2.3--1.63)	-2.38 (-3.07--1.69)
Liberia	-2.28 (-2.53--2.03)	0 (-0.47-0.47)	-1.68 (-2.13--1.23)	-5.76 (-6.19--5.33)	-3.05 (-4.85--1.2)	-5.21 (-5.37--5.06)	-3.71 (-3.89--3.54)	-3.44 (-3.89--2.99)	-4.23 (-5.23--3.22)	-1.99 (-2.25--1.73)
Afghanistan	-2.13 (-2.54--1.71)	-1.07 (-1.17--0.97)	-2.7 (-3.21--2.18)	-6.59 (-7.28--5.89)	0.63 (0.29-0.97)	-4.25 (-4.58--3.93)	-4.09 (-4.5--3.68)	-2.49 (-2.66--2.31)	-5.02 (-6.12--3.92)	-2.42 (-2.79--2.04)
Grenada	2.08 (0.71-3.47)	-0.73 (-1.59-0.14)	0.21 (-0.5-0.93)	-6.06 (-6.7--5.41)	-3.31 (-3.98--2.63)	-3.15 (-3.62--2.68)	-1.96 (-2.73--1.18)	1.86 (0.88-2.85)	-4.13 (-4.65--3.6)	5.21 (4.37-6.06)
Greece	-2.05 (-2.92--1.18)	3.16 (1.96-4.37)	1.49 (0.44-2.55)	-1.25 (-1.91--0.59)	8.19 (6.91-9.49)	-0.1 (-0.47-0.27)	-0.11 (-0.45-0.24)	0.21 (0.08-0.33)	-1 (-1.27--0.73)	3.16 (2.41-3.91)
France	-2.05 (-2.41--1.69)	-2.82 (-3.39--2.25)	-1.36 (-2.41--0.31)	-3.56 (-4.01--3.1)	-3.03 (-3.38--2.68)	-3.12 (-3.39--2.85)	-1.61 (-1.83--1.38)	-0.82 (-0.9--0.74)	-0.95 (-1.05--0.84)	-2.08 (-2.48--1.67)
Switzerland	-2.02 (-2.61--1.42)	3.79 (2.81-4.79)	0.91 (-0.1-1.94)	-0.76 (-1.12--0.39)	-0.77 (-1.78-0.24)	-0.83 (-1.16--0.49)	-0.77 (-1.26--0.28)	0.48 (0.27-0.69)	-1.17 (-1.32--1.02)	0.27 (-0.43-0.97)
El Salvador	-2.01 (-2.63--1.4)	-1.15 (-1.88--0.41)	-5.14 (-6.12--4.15)	-11.25 (-12.37--10.11)	0.09 (-0.67-0.86)	-7.65 (-8.58--6.7)	-7.48 (-8.51--6.45)	-1.23 (-1.66--0.81)	-10.48 (-11.82--9.12)	-2.86 (-3.6--2.11)
Denmark	-2 (-2.66--1.33)	-5.12 (-6.73--3.49)	-6.78 (-8.65--4.88)	-2.44 (-3.04--1.83)	-0.5 (-2.19-1.21)	-3.17 (-3.82--2.52)	-5.05 (-6.21--3.88)	-0.41 (-0.53--0.29)	-1.33 (-1.52--1.15)	-2.61 (-3.94--1.27)
Spain	-2 (-2.49--1.51)	-5.74 (-6.35--5.13)	-1.45 (-1.98--0.93)	-4.07 (-5.02--3.11)	-4.15 (-4.93--3.36)	-1.8 (-2.09--1.5)	-0.86 (-1.2--0.52)	-0.26 (-0.43--0.09)	-1.41 (-1.69--1.13)	-0.63 (-1.2--0.05)
Poland	-10.02 (-11.3--8.72)	-10.78 (-12.11--9.43)	-5.42 (-6.19--4.65)	-7.65 (-8.4--6.9)	1.37 (0.66-2.09)	-4 (-4.58--3.41)	-4.53 (-5.03--4.03)	-2.45 (-2.91--1.98)	-4.7 (-5.22--4.18)	-4.52 (-5.46--3.56)
Timor-Leste	-1.91 (-2.57--1.25)	3.47 (2.96-3.98)	-3.58 (-3.91--3.25)	-11.2 (-11.71--10.68)	-8.37 (-9.53--7.2)	-4.55 (-5.1--4.01)	-2.92 (-3.3--2.53)	-0.97 (-1.28--0.66)	-7.33 (-8.11--6.53)	-0.26 (-1.01-0.49)
Ghana	-1.89 (-2.2--1.58)	1.27 (0.86-1.67)	-1.13 (-1.41--0.84)	-6.5 (-6.74--6.26)	-2.73 (-3.21--2.25)	-3.62 (-3.85--3.39)	-2.95 (-3.37--2.54)	-1.43 (-1.67--1.19)	-5.61 (-5.88--5.34)	-2.05 (-2.34--1.75)
Peru	-1.76 (-2.76--0.76)	1.02 (0.18-1.86)	-5.33 (-5.73--4.92)	-11.84 (-12.51--11.16)	-1.02 (-1.67--0.37)	-8.63 (-8.97--8.29)	-8.14 (-8.54--7.74)	0.57 (0.21-0.93)	-10.78 (-11.3--10.26)	-0.37 (-1.48-0.75)
Mauritania	-1.72 (-2.01--1.42)	0.74 (0.56-0.93)	-1.89 (-1.98--1.8)	-7.56 (-8--7.12)	-1.12 (-1.92--0.31)	-4.3 (-4.6--4)	-3.25 (-3.55--2.94)	-0.69 (-0.9--0.47)	-7.96 (-8.23--7.68)	-1.37 (-1.65--1.09)
Marshall Islands	-1.71 (-2.05--1.36)	0.18 (-0.21-0.57)	-1.34 (-1.65--1.03)	-4.81 (-5.42--4.18)	1.19 (0.86-1.52)	-3.65 (-3.81--3.49)	-0.89 (-1.39--0.39)	0.45 (0.02-0.89)	-2.98 (-3.65--2.32)	-0.45 (-0.89-0)
Ireland	-1.68 (-2.76--0.59)	1.02 (-0.7-2.76)	0.74 (-0.94-2.46)	-4.28 (-5.04--3.51)	6.64 (4.65-8.67)	-2.7 (-3.36--2.03)	-1.98 (-2.77--1.18)	-0.57 (-0.71--0.43)	-1.23 (-1.39--1.07)	0.37 (-1.02-1.77)
Sweden	-1.68 (-2.06--1.3)	-2.76 (-4.17--1.33)	-2.42 (-3.81--1)	-2.23 (-2.5--1.96)	2.88 (1.38-4.4)	-3 (-3.29--2.71)	-1.35 (-1.77--0.92)	-2.25 (-2.69--1.8)	-1.46 (-1.81--1.1)	-0.67 (-1.68-0.35)
Zimbabwe	1.66 (0.53-2.79)	2.02 (1.01-3.03)	1.39 (0.25-2.55)	1.29 (-0.23-2.84)	0 (0-0)	0.89 (-0.15-1.94)	1.88 (0.89-2.89)	1.26 (0.82-1.7)	4.11 (2.52-5.72)	2.33 (1.21-3.47)
Vanuatu	-1.64 (-1.91--1.36)	-0.24 (-0.54-0.07)	-2.09 (-2.36--1.83)	-5.1 (-5.33--4.87)	1.04 (0.44-1.65)	-3.45 (-3.62--3.28)	-0.51 (-0.75--0.27)	-0.93 (-1.25--0.6)	-2.86 (-3.21--2.5)	-0.43 (-0.71--0.14)
Burkina Faso	-1.61 (-1.84--1.38)	2.96 (2.74-3.18)	0.08 (-0.22-0.38)	-4.22 (-4.57--3.86)	-6.24 (-6.65--5.82)	-1.59 (-1.77--1.41)	-1.23 (-1.45--1.01)	2.38 (1.76-3)	-4.52 (-4.92--4.13)	-0.65 (-0.85--0.46)
Kenya	-1.58 (-2.08--1.08)	-3.12 (-3.64--2.6)	-0.94 (-1.21--0.67)	-3.32 (-3.65--2.98)	-1.4 (-2.39--0.41)	-2.92 (-3.27--2.57)	-2.05 (-2.57--1.52)	1.16 (1.03-1.28)	-2.89 (-3.45--2.33)	-0.97 (-1.46--0.48)
Andorra	-1.51 (-1.57--1.44)	-1.72 (-1.9--1.53)	-0.58 (-0.84--0.31)	-2.9 (-3.02--2.78)	2.9 (2.28-3.53)	-0.71 (-0.87--0.54)	-0.41 (-0.47--0.36)	-0.29 (-0.36--0.21)	-0.94 (-1.02--0.87)	0.61 (0.47-0.76)
Suriname	1.49 (1.06-1.93)	1.78 (0.96-2.6)	3.68 (3.09-4.26)	-4.08 (-4.57--3.59)	4.58 (3.75-5.42)	-1.3 (-1.7--0.89)	-1.36 (-1.98--0.74)	1.11 (0.77-1.46)	-1.65 (-2.18--1.12)	1.82 (1.44-2.19)
Iceland	-1.48 (-1.68--1.28)	-4.53 (-5.15--3.91)	-5.19 (-6.05--4.31)	-1.16 (-1.31--1.02)	0.91 (0.2-1.62)	-1.84 (-2.02--1.65)	-3.42 (-3.68--3.16)	-0.56 (-0.85--0.27)	-1.65 (-1.8--1.49)	-0.89 (-1.29--0.5)
Kiribati	1.43 (0.68-2.18)	1.01 (0.32-1.71)	-2.44 (-2.57--2.3)	-5.17 (-5.32--5.02)	-5.4 (-5.67--5.13)	-4.99 (-5.13--4.86)	-2.47 (-2.66--2.29)	3.33 (2.46-4.2)	-2.29 (-2.5--2.08)	0.33 (-0.22-0.89)
Thailand	-1.36 (-2.25--0.47)	5.7 (4.18-7.23)	-2.46 (-3.09--1.83)	-10.3 (-10.83--9.78)	-3.9 (-5.74--2.01)	-7.4 (-8.2--6.6)	-2.7 (-3.25--2.14)	-2.38 (-2.65--2.11)	-3.04 (-3.48--2.6)	-3.52 (-4.27--2.76)
Uzbekistan	-1.34 (-1.84--0.84)	0.84 (-0.03-1.72)	-1.47 (-2.37--0.56)	-4.38 (-4.92--3.83)	7.58 (6.55-8.62)	-3.5 (-3.98--3.01)	-1.77 (-2.47--1.06)	-3.22 (-3.68--2.76)	-2.93 (-3.5--2.35)	-1.46 (-2.18--0.74)
Congo	-1.3 (-1.98--0.61)	0.44 (-0.2-1.08)	-0.56 (-1.17-0.05)	-6.59 (-7.37--5.8)	-3.65 (-4.23--3.06)	-3.38 (-3.97--2.78)	-2.11 (-2.83--1.39)	-0.4 (-0.88-0.08)	-4.03 (-4.85--3.2)	-0.1 (-0.82-0.61)
Canada	-1.29 (-1.8--0.77)	5.67 (4.23-7.14)	0.78 (-0.02-1.59)	-2.18 (-2.57--1.78)	5.96 (4.91-7.01)	-2.25 (-2.65--1.86)	-1.57 (-2.3--0.84)	-0.19 (-0.31--0.07)	-1.75 (-2.11--1.39)	1.46 (0.76-2.16)
Kyrgyzstan	-1.28 (-1.83--0.72)	-0.08 (-0.89-0.74)	-0.17 (-0.82-0.49)	-4.79 (-5.15--4.43)	11.42 (10.41-12.45)	-2.52 (-3.23--1.8)	-2.17 (-2.94--1.4)	0.4 (-0.16-0.96)	0.27 (-0.49-1.03)	-1.11 (-1.75--0.46)
Panama	1.28 (0.81-1.75)	0.17 (-0.19-0.52)	1.01 (0.67-1.35)	-4.63 (-4.97--4.29)	3.99 (3.38-4.6)	0.29 (-0.09-0.67)	-1.22 (-1.55--0.88)	4.58 (4.04-5.12)	-2.78 (-3.19--2.38)	3.96 (3.22-4.7)
Lesotho	1.24 (0.39-2.09)	2.66 (1.86-3.47)	1.2 (0.42-1.99)	-0.65 (-1.83-0.55)	4.8 (3.41-6.2)	-0.32 (-1.09-0.45)	1.29 (0.43-2.17)	-0.81 (-0.94--0.67)	-1.19 (-2.1--0.28)	1.81 (0.97-2.65)
New Zealand	-1.21 (-1.58--0.84)	2.88 (1.84-3.93)	-0.24 (-1.15-0.67)	-3.26 (-3.48--3.04)	8.48 (7.26-9.7)	-1.56 (-1.86--1.26)	-1.47 (-1.76--1.17)	0.82 (0.31-1.32)	-0.44 (-0.57--0.31)	-1.37 (-2.06--0.69)
Guinea	-1.14 (-1.34--0.94)	1.12 (0.98-1.27)	-0.51 (-0.67--0.35)	-2.69 (-3.02--2.35)	3.8 (2.6-5.02)	-2.84 (-2.95--2.73)	-1.35 (-1.52--1.18)	-2.6 (-2.83--2.37)	-2.13 (-2.32--1.94)	-0.14 (-0.31-0.03)
Saint Vincent and the Grenadines	1.11 (0.8-1.42)	1.41 (0.93-1.9)	0.79 (0.45-1.12)	-4.05 (-4.55--3.54)	-1.47 (-2.32--0.62)	-1.74 (-1.96--1.52)	-1.53 (-2.01--1.05)	-0.2 (-0.63-0.23)	-1.69 (-2.01--1.37)	1.99 (1.7-2.29)
Saint Kitts and Nevis	1.09 (0.47-1.7)	-1.5 (-2.09--0.91)	-2.14 (-2.63--1.64)	-7.03 (-7.95--6.1)	-4.81 (-5.62--4)	-4.69 (-5.19--4.18)	-4.55 (-5.19--3.91)	2.84 (1.5-4.2)	-5.09 (-6.06--4.12)	2.3 (1.64-2.96)
Turkmenistan	-1.07 (-1.53--0.61)	2.35 (1.87-2.82)	-0.38 (-0.86-0.11)	-4.52 (-4.93--4.11)	-3.59 (-4--3.18)	-2.63 (-3.01--2.26)	-1.91 (-2.36--1.46)	-1.68 (-2.08--1.29)	-2.97 (-3.15--2.79)	0.46 (0.04-0.87)
Myanmar	1.07 (0.7-1.45)	3.81 (3.28-4.34)	-0.2 (-0.38--0.03)	-6.38 (-6.5--6.27)	4.02 (1.27-6.85)	-2.27 (-2.58--1.95)	-1.19 (-1.37--1.01)	0.79 (0.49-1.09)	-6.43 (-6.99--5.87)	1.75 (1.3-2.21)
Niger	-1.04 (-1.29--0.78)	2.45 (1.94-2.95)	0.11 (0-0.23)	-2.35 (-2.67--2.04)	0.32 (-1.93-2.61)	-2 (-2.2--1.8)	-1.41 (-1.59--1.23)	-2.16 (-2.4--1.92)	-2.92 (-3.15--2.68)	0.88 (0.61-1.15)
Gambia	-1.03 (-1.52--0.54)	0.13 (-0.3-0.57)	-0.91 (-1.37--0.44)	-3.61 (-4.31--2.91)	7.33 (4.75-9.98)	-3.33 (-3.75--2.9)	-1.8 (-2.29--1.31)	-1.9 (-2.06--1.73)	-2.37 (-2.78--1.96)	-0.72 (-1.13--0.3)
Montenegro	-1.03 (-1.31--0.75)	1.61 (0.98-2.25)	-1.32 (-1.88--0.76)	-5.05 (-5.8--4.3)	2.63 (1.54-3.73)	-1.93 (-2.21--1.66)	-0.88 (-1.07--0.7)	-0.92 (-1.17--0.68)	-2.16 (-2.32--2.01)	-0.59 (-1.16--0.03)
United States Virgin Islands	-1.02 (-1.64--0.4)	-1.04 (-1.44--0.63)	-1.1 (-1.61--0.6)	-4.72 (-5.05--4.39)	-3.35 (-3.75--2.95)	-2.98 (-3.07--2.88)	-3.83 (-3.93--3.73)	-0.74 (-1.93-0.47)	-3.4 (-3.57--3.23)	-0.14 (-0.66-0.38)
Cameroon	-1.02 (-1.61--0.42)	-0.22 (-0.83-0.39)	-0.31 (-0.86-0.24)	-4.17 (-5.06--3.28)	2.23 (0.04-4.47)	-3.58 (-4.12--3.04)	-1.9 (-2.53--1.27)	-2.72 (-2.96--2.48)	-3.41 (-4.11--2.7)	-0.78 (-1.31--0.25)
Eritrea	-0.99 (-1.56--0.42)	2.33 (1.99-2.67)	-1.01 (-1.18--0.84)	-6.92 (-7.31--6.53)	-4.19 (-6.19--2.14)	-2.4 (-2.71--2.09)	-0.61 (-0.98--0.24)	-1.08 (-1.26--0.91)	-3.6 (-4.17--3.02)	0.42 (0.04-0.79)
C么te d'Ivoire	-0.99 (-1.36--0.62)	0.31 (-0.07-0.7)	-0.6 (-1.02--0.18)	-3.16 (-3.78--2.53)	-3.39 (-3.89--2.88)	-3.39 (-3.69--3.1)	-2.29 (-2.69--1.89)	-2.44 (-2.62--2.26)	-2.93 (-3.41--2.45)	-0.75 (-1.05--0.45)
Monaco	-0.99 (-1.16--0.81)	-0.72 (-0.85--0.58)	0.78 (0.54-1.03)	-1.97 (-2.27--1.67)	4.07 (3.77-4.37)	-1.06 (-1.21--0.91)	-0.69 (-0.81--0.57)	-0.4 (-0.49--0.31)	-1.12 (-1.19--1.04)	2.18 (1.72-2.63)
Djibouti	-0.94 (-1.2--0.69)	0.53 (0.31-0.76)	-0.27 (-0.49--0.06)	-5.69 (-6.26--5.11)	8.56 (3.41-13.96)	-3.19 (-3.54--2.84)	-1.03 (-1.48--0.59)	0.2 (0.02-0.37)	-2.6 (-3.17--2.03)	-0.41 (-0.69--0.14)
Somalia	-0.93 (-1.1--0.76)	-0.13 (-0.58-0.31)	-1.3 (-1.39--1.22)	-3.79 (-4--3.58)	0.24 (-1.91-2.43)	-2.49 (-2.62--2.37)	-1.09 (-1.15--1.04)	-2.11 (-2.22--2)	-1.16 (-1.36--0.96)	-0.37 (-0.49--0.25)
Papua New Guinea	-0.92 (-1.2--0.64)	-0.25 (-0.59-0.09)	-1.52 (-1.69--1.36)	-5.12 (-5.31--4.93)	17.56 (11.96-23.43)	-2.73 (-2.9--2.56)	-1.15 (-1.48--0.82)	-0.73 (-1.05--0.41)	-2.88 (-3.28--2.48)	-1 (-1.27--0.73)
American Samoa	0.86 (0.35-1.38)	0.1 (-0.37-0.58)	1.36 (1.16-1.57)	-5.61 (-6.32--4.91)	4.56 (3.89-5.24)	-2.13 (-2.22--2.05)	1.23 (0.57-1.89)	0.96 (0.85-1.07)	-4.18 (-4.39--3.96)	2.16 (1.97-2.34)
Mauritius	0.8 (-0.56-2.16)	3.09 (1.04-5.17)	-1.05 (-2.34-0.26)	-6.56 (-8.16--4.94)	15.83 (14.2-17.48)	-4.66 (-5.36--3.94)	-3.08 (-4.42--1.73)	-0.37 (-0.88-0.13)	-1.32 (-2.32--0.3)	2.05 (1.21-2.89)
Mozambique	0.74 (0.22-1.27)	3.04 (2.53-3.55)	0.37 (-0.07-0.82)	-6.4 (-6.76--6.03)	2.92 (1.92-3.93)	-1.28 (-1.68--0.88)	-0.34 (-0.74-0.06)	-0.83 (-1.11--0.55)	-5.41 (-5.88--4.94)	-0.21 (-0.62-0.21)
Nigeria	-0.72 (-1.38--0.05)	0.75 (0.33-1.17)	0.71 (0.12-1.3)	-2.49 (-3--1.98)	2.99 (1.22-4.8)	-0.91 (-1.32--0.5)	-0.17 (-0.58-0.24)	1.79 (1.37-2.21)	-2.77 (-3.65--1.89)	-0.15 (-0.58-0.28)
Chad	0.71 (0.44-0.99)	3 (2.88-3.12)	0.75 (0.51-0.98)	-0.58 (-1.24-0.08)	0.47 (-0.69-1.64)	-0.45 (-0.65--0.24)	0.48 (0.31-0.66)	-0.56 (-0.74--0.39)	-2.19 (-2.67--1.7)	2.13 (1.96-2.29)
Democratic Republic of the Congo	-0.68 (-1.03--0.33)	1.03 (0.58-1.48)	-0.04 (-0.57-0.5)	-3.82 (-4.24--3.4)	-3 (-4.12--1.87)	-2.33 (-2.66--2)	-2.03 (-2.33--1.73)	-1.85 (-2.05--1.65)	0.44 (-0.75-1.65)	0.5 (0.08-0.91)
Sierra Leone	0.67 (0.26-1.08)	3.36 (2.95-3.77)	0.82 (0.37-1.29)	-2.24 (-3.09--1.38)	8.78 (5.96-11.68)	-2.23 (-2.62--1.83)	-0.86 (-1.21--0.51)	-2.82 (-2.94--2.71)	-1.36 (-2.21--0.49)	0.77 (0.41-1.14)
Pakistan	-0.59 (-1.05--0.12)	-1.15 (-1.37--0.93)	-0.59 (-0.87--0.32)	-6.75 (-7.75--5.74)	10.89 (10.39-11.4)	-3.27 (-3.72--2.82)	-1.43 (-1.84--1.02)	-1.05 (-1.57--0.54)	-5.41 (-5.89--4.92)	-0.14 (-0.61-0.33)
Saint Lucia	0.53 (0.07-1)	-0.25 (-1.17-0.67)	1.16 (0.55-1.78)	-6.45 (-7.32--5.57)	-1.8 (-2.23--1.37)	-3.68 (-4.28--3.09)	-3.14 (-3.83--2.45)	2.27 (1.29-3.26)	-3.76 (-4.62--2.89)	2.4 (1.83-2.98)
San Marino	-0.5 (-0.56--0.44)	0.48 (0.25-0.71)	1.39 (1.15-1.63)	-1.93 (-2.09--1.77)	11.74 (11.22-12.26)	-0.64 (-0.7--0.59)	0.04 (-0.04-0.12)	-0.02 (-0.07-0.03)	-0.69 (-0.71--0.68)	1.97 (1.73-2.21)
Northern Mariana Islands	-0.48 (-1.14-0.18)	-2.05 (-2.48--1.62)	0.12 (-0.16-0.41)	-4.15 (-4.61--3.69)	1.32 (0.62-2.02)	-0.53 (-0.72--0.35)	-0.55 (-0.97--0.12)	-0.01 (-0.22-0.2)	-3.29 (-3.6--2.98)	0.56 (0.27-0.85)
Solomon Islands	-0.41 (-0.67--0.15)	1.49 (1.08-1.91)	-1.04 (-1.23--0.86)	-5.28 (-5.59--4.97)	-1.1 (-1.5--0.71)	-2.99 (-3.11--2.87)	-0.01 (-0.43-0.41)	2.1 (1.79-2.42)	-1.46 (-2.11--0.79)	0.79 (0.41-1.18)
Senegal	-0.39 (-0.65--0.13)	1.66 (1.25-2.06)	-0.01 (-0.36-0.35)	-3 (-3.3--2.7)	1.93 (0.45-3.44)	-3.06 (-3.28--2.83)	-2.35 (-2.64--2.05)	-0.59 (-1--0.17)	-3.79 (-4.06--3.52)	-0.1 (-0.39-0.2)
Central African Republic	-0.36 (-0.67--0.04)	0.47 (0.09-0.85)	-0.97 (-1.22--0.72)	-3.16 (-3.49--2.82)	-2.26 (-3.06--1.45)	-1.75 (-2.01--1.5)	-0.27 (-0.58-0.04)	-1.21 (-1.31--1.11)	0.06 (-0.11-0.23)	0.85 (0.49-1.21)
South Sudan	-0.29 (-0.58-0)	1.06 (0.51-1.61)	-0.79 (-0.97--0.61)	-2.92 (-3.06--2.78)	0.05 (-0.88-0.98)	-0.92 (-1.2--0.64)	0.31 (0.08-0.53)	-0.57 (-0.68--0.45)	-1.52 (-1.76--1.28)	0.91 (0.65-1.16)
Angola	-0.23 (-0.55-0.1)	2.07 (1.79-2.36)	-0.77 (-1.02--0.53)	-6.46 (-6.98--5.93)	7.52 (5.19-9.9)	-3.26 (-3.53--3)	-1.66 (-1.97--1.36)	-3.56 (-3.65--3.47)	-4.24 (-4.67--3.81)	0.93 (0.56-1.3)
Yemen	-0.19 (-0.66-0.28)	0.85 (0.23-1.48)	-1.38 (-1.71--1.05)	-6.07 (-6.49--5.64)	0.09 (-0.18-0.37)	-2.29 (-2.72--1.86)	-1.87 (-2.3--1.43)	-3.64 (-3.81--3.48)	-3.99 (-4.25--3.74)	0.77 (0.14-1.41)
Romania	-0.09 (-0.73-0.55)	17.35 (15.39-19.34)	-4.45 (-5.13--3.77)	-11.7 (-12.38--11.01)	3.59 (2.84-4.35)	-2.88 (-3.16--2.61)	-1.75 (-2.18--1.31)	2.65 (2.08-3.21)	-5.64 (-6.31--4.97)	5.69 (4.97-6.41)
Uganda	0.03 (-0.66-0.73)	2.36 (2.01-2.7)	0.44 (-0.15-1.05)	-5.05 (-5.87--4.22)	-2.82 (-3.47--2.16)	-1.8 (-2.42--1.17)	-0.65 (-1.36-0.06)	-1.16 (-1.27--1.05)	-3.45 (-4.09--2.81)	0.59 (-0.05-1.23)
